# Supplementary material for: Rumen fluke (Calicophoron daubneyi) on Welsh farms: prevalence, risk factors and observations on co-infection with Fasciola hepatica
Source: PubMed Central journal article supplement (PMC5300002; doi:10.1017/s0031182016001797), 2016-11-01
Supplement: S0031182016001797sup001.pdf [file S0031182016001797sup001.pdf]

**Supplementary table 1: Variables accepted and rejected as candidate variables for inclusion in logistic regression models after univariate analysis**

| Variable                                                   | Source             | Significance |        |       |
|------------------------------------------------------------|--------------------|--------------|--------|-------|
|                                                            |                    | Farm         | Cattle | Sheep |
| Liver fluke +/-<br>Mt Summer 2015                          | FEC<br>Ollerenshaw | *            | **     | NS    |
|                                                            | index              | NS           | *      | NS    |
| Mt Summer 2011-15                                          | Ollerenshaw        |              | †      | NS    |
|                                                            | index              | NS           |        | NS    |
| Mt Winter 2014/15                                          | Ollerenshaw        |              |        |       |
|                                                            | index              | NS           | NS     | NS    |
| Mt Summer 2010/11-2014/15                                  | Ollerenshaw        |              |        |       |
|                                                            | index              | NS           | NS     | NS    |
| Rainfall (April - September) 2015                          | Met-Office         | NS           | NS     | NS    |
| Rainfall (April - September) 2011-2015                     | Met-Office         | NS           | NS     | NS    |
| Rain days 1mm (April - September) 2015                     | Met-Office         | NS           | NS     | NS    |
| Rain days 1mm (April - September) 2011-2015                | Met-Office         | NS           | NS     | NS    |
| Mean temperature (April - September) 2015                  | Met-Office         | †            | **     | NS    |
| Mean temperature (April - September) 2011-2015             | Met-Office         | †            | **     | NS    |
| Mean winter min Temperature (3 coldest month)<br>2014/15   | Met-Office         | *            | **     | †     |
| Mean winter min Temperature (3 coldest month)<br>2011-2015 | Met-Office         | *            | **     | †     |
| Growing degree days 2015                                   | Met-Office         | NS           | **     | NS    |
| Growing degree days 2011/15                                | Met-Office         | NS           | **     | NS    |
| Sunshine May-July 2015                                     | Met-Office         | **           | **     | ***   |
| Sunshine May-July 2011/15                                  | Met-Office         | **           | **     | ***   |
| Sunshine April-September 2015                              | Met-Office         | **           | **     | ***   |
| Sunshine April-September 2011/15                           | Met-Office         | **           | **     | ***   |
| Soil pH                                                    | CEH                | *            | NS     | NS    |
| Soil type (Light)                                          | CEH                | NS           | NS     | NS    |
| Soil type (Heavy)                                          | CEH                | *            | NS     | NS    |
| Soil moisture                                              | CEH                | *            | NS     | †     |
| Soil Cu                                                    | BGS                | †            | †      | *     |
| Soil Fe                                                    | BGS                | NS           | NS     | NS    |
| Soil P                                                     | BGS                | NS           | *      | NS    |
| Soil Pb                                                    | BGS                | *            | NS     | NS    |
| Soil Zn                                                    | BGS                | **           | †      | †     |
| Dairy cattle (Yes/no)                                      | Questionnaire      | NS           | NS     | NS    |
| Suckler cattle (Yes/no)                                    | Questionnaire      | NS           | NS     | NS    |
| Heifers/Steer cattle (Yes/no)                              | Questionnaire      | NS           | NS     | NS    |
| Sheep (Yes/no)                                             | Questionnaire      | NS           | NS     | NS    |
| Dairy cattle numbers                                       | Questionnaire      | NS           | NS     | NS    |
| Suckler cattle numbers                                     | Questionnaire      | NS           | NS     | NS    |
| Heifers/Steers cattle numbers                              | Questionnaire      | *            | †      | †     |

|                                                                |               |     |    |     |
|----------------------------------------------------------------|---------------|-----|----|-----|
| Sheep numbers                                                  | Questionnaire | NS  | NS | NS  |
| Total cattle numbers                                           | Questionnaire | *   | †  | NS  |
| Total LSU                                                      | Questionnaire | NS  | NS | NS  |
| Purchase replacement heifers/cattle                            | Questionnaire | NS  | NS | NS  |
| Purchase replacement ewes                                      | Questionnaire | NS  | NS | NS  |
| Quarantine treatment against <i>F. hepatica</i>                | Questionnaire | NS  | NS | NS  |
| Quarantine treatment against <i>C. daubneyi</i>                | Questionnaire | NS  | NS | NS  |
| Recently Imported livestock                                    | Questionnaire | NS  | NS | NS  |
| Purchase store cattle                                          | Questionnaire | **  | *  | *   |
| Purchase store sheep                                           | Questionnaire | NS  | NS | NS  |
| Animals from other farm grazing holding                        | Questionnaire | NS  | NS | *   |
| Animals grazing other farm                                     | Questionnaire | NS  | NS | †   |
| Graze common land                                              | Questionnaire | NS  | NS | NS  |
| No contact with animals from other farm                        | Questionnaire | NS  | NS | NS  |
| Organic                                                        | Questionnaire | NS  | NS | NS  |
| Previously organic                                             | Questionnaire | NS  | NS | NS  |
| Deer present                                                   | Questionnaire | NS  | NS | NS  |
| Hares present                                                  | Questionnaire | NS  | NS | NS  |
| Rabbits present                                                | Questionnaire | NS  | NS | NS  |
| Number of yearly treatment against <i>F. hepatica</i>          | Questionnaire | **  | ** | NS  |
| Autumn treatment against <i>F. hepatica</i>                    | Questionnaire | NS  | NS | NS  |
| Winter treatment against <i>F. hepatica</i>                    | Questionnaire | NS  | NS | NS  |
| Spring treatment against <i>F. hepatica</i>                    | Questionnaire | NS  | †  | NS  |
| Summer treatment against <i>F. hepatica</i>                    | Questionnaire | NS  | NS | NS  |
| Use of Oxytoclozanide                                          | Questionnaire | NS  | NS | NS  |
| Resistance to <i>F. hepatica</i> proven                        | Questionnaire | NS  | NS | NS  |
| Resistance to <i>F. hepatica</i> suspected                     | Questionnaire | NS  | NS | NS  |
| Farm area (ha)                                                 | Questionnaire | NS  | NS | NS  |
| Stocking density LSU/ha                                        | Questionnaire | NS  | NS | NS  |
| Soil moisture                                                  | Questionnaire | NS  | NS | NS  |
| Flooding occurrence                                            | Questionnaire | NS  | NS | NS  |
| Presence of bog habitats                                       | Questionnaire | *   | *  | NS  |
| Presence of wet habitats                                       | Questionnaire | NS  | NS | NS  |
| Presence of stream/drainage ditch habitats                     | Questionnaire | *   | NS | *   |
| Presence of pond habitats                                      | Questionnaire | NS  | NS | NS  |
| Percentage of fields containing bog habitats                   | Questionnaire | NS  | NS | NS  |
| Percentage of fields containing wet habitats                   | Questionnaire | NS  | NS | NS  |
| Percentage of fields containing stream/drainage ditch habitats | Questionnaire | NS  | NS | NS  |
| Percentage of fields containing pond habitats                  | Questionnaire | NS  | NS | NS  |
| Grazing season length (cattle only)                            | Questionnaire | N/A | †  | N/A |
| Natural water access for livestock                             | Questionnaire | NS  | NS | NS  |
| Artificial water access for livestock                          | Questionnaire | NS  | NS | NS  |
| Water flowing from other farm                                  | Questionnaire | NS  | †  | NS  |

† P<0.10, \* P<0.05, \*\* P<0.01, \*\*\* P<0.001
